# Supplementary material for: SARS-CoV-2 Detection for Diagnosis Purposes in the Setting of a Molecular Biology Research Lab
Source: Methods Protoc. 2020 Aug 18;3(3):59. doi: 10.3390/mps3030059 (PMC7564796; doi:10.3390/mps3030059)
Supplement: Supplementary file 1 [file mps-03-00059-s001.xlsx]

## Sheet: raw
Color	Position	Sample Name	Gene Name	Cq	Concentration	Call	Excluded	Sample Type	Standard	Cq Mean	Cq Error	Concentration Mean	Concentration Error	Replicate Group	Dye	Edited Call	Slope	EPF	Failure	Notes	Sample Prep Notes	Number
255;132;197;238	A1	861	SARS	-	-	Negative	Unchecked	Unknown	-	-	-	-	-		FAM		0	0	None			1
255;103;103;103	A2	862	SARS	-	-	Negative	Unchecked	Unknown	-	-	-	-	-		FAM		0	0.02	None			3
255;242;138;21	A3	863	SARS	-	-	Negative	Unchecked	Unknown	-	-	-	-	-		FAM		0	0.03	None			5
255;250;215;15	A4	864	SARS	-	-	Negative	Unchecked	Unknown	-	-	-	-	-		FAM		0	0.01	None			7
255;103;154;47	A5	865	SARS	-	-	Negative	Unchecked	Unknown	-	-	-	-	-		FAM		0	0.01	None			9
255;180;73;149	A6	866	SARS	-	-	Negative	Unchecked	Unknown	-	-	-	-	-		FAM		0	0.01	None			11
255;95;103;174	A7	867	SARS	-	-	Negative	Unchecked	Unknown	-	-	-	-	-		FAM		0	0	None			13
255;205;18;55	A8	868	SARS	27.26	-	Positive	Unchecked	Unknown	-	27.26	0	-	-		FAM		0.1	1.27	None			15
255;34;176;146	A9	869	SARS	-	-	Negative	Unchecked	Unknown	-	-	-	-	-		FAM		0	0.01	None			17
255;47;73;113	A10	870	SARS	-	-	Negative	Unchecked	Unknown	-	-	-	-	-		FAM		0	0	None			19
255;234;79;79	A11	871	SARS	-	-	Negative	Unchecked	Unknown	-	-	-	-	-		FAM		0	0	None			21
255;66;41;24	A12	872	SARS	-	-	Negative	Unchecked	Unknown	-	-	-	-	-		FAM		0	0.01	None			23
255;66;41;24	B1	873	SARS	-	-	Negative	Unchecked	Unknown	-	-	-	-	-		FAM		0	0.01	None			25
255;132;197;238	B2	874	SARS	-	-	Negative	Unchecked	Unknown	-	-	-	-	-		FAM		0	0	None			27
255;103;103;103	B3	875	SARS	-	-	Negative	Unchecked	Unknown	-	-	-	-	-		FAM		0	0.02	None			29
255;242;138;21	B4	876	SARS	-	-	Negative	Unchecked	Unknown	-	-	-	-	-		FAM		0	0	None			31
255;250;215;15	B5	877	SARS	-	-	Negative	Unchecked	Unknown	-	-	-	-	-		FAM		0	0.01	None			33
255;103;154;47	B6	878	SARS	-	-	Negative	Unchecked	Unknown	-	-	-	-	-		FAM		0	0.01	None			35
255;180;73;149	B7	879	SARS	-	-	Negative	Unchecked	Unknown	-	-	-	-	-		FAM		0	0.01	None			37
255;95;103;174	B8	880	SARS	-	-	Negative	Unchecked	Unknown	-	-	-	-	-		FAM		0	0.01	None			39
255;205;18;55	B9	881	SARS	-	-	Negative	Unchecked	Unknown	-	-	-	-	-		FAM		0	0.01	None			41
255;34;176;146	B10	882	SARS	-	-	Negative	Unchecked	Unknown	-	-	-	-	-		FAM		0	0.02	None			43
255;47;73;113	B11	883	SARS	-	-	Negative	Unchecked	Unknown	-	-	-	-	-		FAM		0	0.02	None			45
255;234;79;79	B12	884	SARS	-	-	Negative	Unchecked	Unknown	-	-	-	-	-		FAM		0	0.02	None			47
255;234;79;79	C1	885	SARS	22.83	-	Positive	Unchecked	Unknown	-	22.83	0	-	-		FAM		0.11	1.41	None			49
255;66;41;24	C2	886	SARS	-	-	Negative	Unchecked	Unknown	-	-	-	-	-		FAM		0	0	None			51
255;132;197;238	C3	887	SARS	38.39	-	Positive	Unchecked	Unknown	-	38.39	0	-	-		FAM		0.07	0.46	None			53
255;103;103;103	C4	888	SARS	22.45	-	Positive	Unchecked	Unknown	-	22.45	0	-	-		FAM		0.1	1.39	None			55
255;242;138;21	C5	889	SARS	-	-	Negative	Unchecked	Unknown	-	-	-	-	-		FAM		0	0.01	None			57
255;250;215;15	C6	890	SARS	-	-	Negative	Unchecked	Unknown	-	-	-	-	-		FAM		0	0.01	None			59
255;103;154;47	C7	891	SARS	-	-	Negative	Unchecked	Unknown	-	-	-	-	-		FAM		0	0	None			61
255;180;73;149	C8	892	SARS	-	-	Negative	Unchecked	Unknown	-	-	-	-	-		FAM		0	0	None			63
255;95;103;174	C9	893	SARS	-	-	Negative	Unchecked	Unknown	-	-	-	-	-		FAM		0	0.01	None			65
255;205;18;55	C10	894	SARS	-	-	Negative	Unchecked	Unknown	-	-	-	-	-		FAM		0	0	None			67
255;34;176;146	C11	895	SARS	-	-	Negative	Unchecked	Unknown	-	-	-	-	-		FAM		0	0.01	None			69
255;47;73;113	C12	896	SARS	-	-	Negative	Unchecked	Unknown	-	-	-	-	-		FAM		0	0.02	None			71
255;47;73;113	D1	897	SARS	-	-	Negative	Unchecked	Unknown	-	-	-	-	-		FAM		0	0.02	None			73
255;234;79;79	D2	898	SARS	-	-	Negative	Unchecked	Unknown	-	-	-	-	-		FAM		0	0	None			75
255;66;41;24	D3	899	SARS	-	-	Negative	Unchecked	Unknown	-	-	-	-	-		FAM		0	0.01	None			77
255;132;197;238	D4	900	SARS	-	-	Negative	Unchecked	Unknown	-	-	-	-	-		FAM		0	0.02	None			79
255;103;103;103	D5	901	SARS	-	-	Negative	Unchecked	Unknown	-	-	-	-	-		FAM		0	0.01	None			81
255;242;138;21	D6	902	SARS	-	-	Negative	Unchecked	Unknown	-	-	-	-	-		FAM		0	0	None			83
255;250;215;15	D7	EC1	SARS	-	-	Negative	Unchecked	Negative control	-	-	-	-	-		FAM		0	0.01	None			85
255;103;154;47	D8	EC2	SARS	-	-	Negative	Unchecked	Negative control	-	-	-	-	-		FAM		0	0	None			87
255;95;103;174	D10	PC1	SARS	26.94	-	Positive	Unchecked	Positive control	-	26.94	0	-	-		FAM		0.1	1.3	None			89
255;205;18;55	D11	PC2	SARS	31.6	-	Positive	Unchecked	Positive control	-	31.6	0	-	-		FAM		0.1	1.11	None			91
255;34;176;146	D12	NC	SARS	-	-	Negative	Unchecked	Negative control	-	-	-	-	-		FAM		0	0.02	None			93
255;132;197;238	E1	861	IC	33.49	-	Positive	Unchecked	Unknown	-	33.49	0	-	-		FAM		0.07	0.79	None			95
255;103;103;103	E2	862	IC	33.27	-	Positive	Unchecked	Unknown	-	33.27	0	-	-		FAM		0.07	0.81	None			97
255;242;138;21	E3	863	IC	32.92	-	Positive	Unchecked	Unknown	-	32.92	0	-	-		FAM		0.07	0.77	None			99
255;250;215;15	E4	864	IC	32.71	-	Positive	Unchecked	Unknown	-	32.71	0	-	-		FAM		0.07	0.79	None			101
255;103;154;47	E5	865	IC	34.02	-	Positive	Unchecked	Unknown	-	34.02	0	-	-		FAM		0.06	0.65	None			103
255;180;73;149	E6	866	IC	33.73	-	Positive	Unchecked	Unknown	-	33.73	0	-	-		FAM		0.05	0.59	None			105
255;95;103;174	E7	867	IC	33.6	-	Positive	Unchecked	Unknown	-	33.6	0	-	-		FAM		0.06	0.67	None			107
255;205;18;55	E8	868	IC	32.5	-	Positive	Unchecked	Unknown	-	32.5	0	-	-		FAM		0.08	0.95	None			109
255;34;176;146	E9	869	IC	34.16	-	Positive	Unchecked	Unknown	-	34.16	0	-	-		FAM		0.06	0.6	None			111
255;47;73;113	E10	870	IC	33.03	-	Positive	Unchecked	Unknown	-	33.03	0	-	-		FAM		0.08	0.87	None			113
255;234;79;79	E11	871	IC	34.17	-	Positive	Unchecked	Unknown	-	34.17	0	-	-		FAM		0.08	0.78	None			115
255;66;41;24	E12	872	IC	33.12	-	Positive	Unchecked	Unknown	-	33.12	0	-	-		FAM		0.06	0.73	None			117
255;66;41;24	F1	873	IC	32.93	-	Positive	Unchecked	Unknown	-	32.93	0	-	-		FAM		0.06	0.72	None			119
255;132;197;238	F2	874	IC	33.2	-	Positive	Unchecked	Unknown	-	33.2	0	-	-		FAM		0.06	0.66	None			121
255;103;103;103	F3	875	IC	33.29	-	Positive	Unchecked	Unknown	-	33.29	0	-	-		FAM		0.06	0.73	None			123
255;242;138;21	F4	876	IC	32.64	-	Positive	Unchecked	Unknown	-	32.64	0	-	-		FAM		0.07	0.79	None			125
255;250;215;15	F5	877	IC	32.7	-	Positive	Unchecked	Unknown	-	32.7	0	-	-		FAM		0.07	0.77	None			127
255;103;154;47	F6	878	IC	32.54	-	Positive	Unchecked	Unknown	-	32.54	0	-	-		FAM		0.08	0.93	None			129
255;180;73;149	F7	879	IC	33.61	-	Positive	Unchecked	Unknown	-	33.61	0	-	-		FAM		0.06	0.64	None			131
255;95;103;174	F8	880	IC	34.23	-	Positive	Unchecked	Unknown	-	34.23	0	-	-		FAM		0.06	0.67	None			133
255;205;18;55	F9	881	IC	33.04	-	Positive	Unchecked	Unknown	-	33.04	0	-	-		FAM		0.08	0.86	None			135
255;34;176;146	F10	882	IC	32.69	-	Positive	Unchecked	Unknown	-	32.69	0	-	-		FAM		0.08	0.87	None			137
255;47;73;113	F11	883	IC	32.97	-	Positive	Unchecked	Unknown	-	32.97	0	-	-		FAM		0.08	0.87	None			139
255;234;79;79	F12	884	IC	31.94	-	Positive	Unchecked	Unknown	-	31.94	0	-	-		FAM		0.08	0.95	None			141
255;234;79;79	G1	885	IC	32.27	-	Positive	Unchecked	Unknown	-	32.27	0	-	-		FAM		0.08	0.99	None			143
255;66;41;24	G2	886	IC	32.05	-	Positive	Unchecked	Unknown	-	32.05	0	-	-		FAM		0.07	0.81	None			145
255;132;197;238	G3	887	IC	33.56	-	Positive	Unchecked	Unknown	-	33.56	0	-	-		FAM		0.06	0.7	None			147
255;103;103;103	G4	888	IC	31.96	-	Positive	Unchecked	Unknown	-	31.96	0	-	-		FAM		0.07	0.91	None			149
255;242;138;21	G5	889	IC	32.48	-	Positive	Unchecked	Unknown	-	32.48	0	-	-		FAM		0.08	0.88	None			151
255;250;215;15	G6	890	IC	33.44	-	Positive	Unchecked	Unknown	-	33.44	0	-	-		FAM		0.07	0.75	None			153
255;103;154;47	G7	891	IC	33.28	-	Positive	Unchecked	Unknown	-	33.28	0	-	-		FAM		0.06	0.68	None			155
255;180;73;149	G8	892	IC	32.94	-	Positive	Unchecked	Unknown	-	32.94	0	-	-		FAM		0.07	0.84	None			157
255;95;103;174	G9	893	IC	32.4	-	Positive	Unchecked	Unknown	-	32.4	0	-	-		FAM		0.08	0.91	None			159
255;205;18;55	G10	894	IC	32.02	-	Positive	Unchecked	Unknown	-	32.02	0	-	-		FAM		0.08	0.92	None			161
255;34;176;146	G11	895	IC	32.2	-	Positive	Unchecked	Unknown	-	32.2	0	-	-		FAM		0.08	0.92	None			163
255;47;73;113	G12	896	IC	31.97	-	Positive	Unchecked	Unknown	-	31.97	0	-	-		FAM		0.07	0.91	None			165
255;47;73;113	H1	897	IC	31.54	-	Positive	Unchecked	Unknown	-	31.54	0	-	-		FAM		0.08	1.02	None			167
255;234;79;79	H2	898	IC	31.94	-	Positive	Unchecked	Unknown	-	31.94	0	-	-		FAM		0.08	1	None			169
255;66;41;24	H3	899	IC	31.88	-	Positive	Unchecked	Unknown	-	31.88	0	-	-		FAM		0.08	0.98	None			171
255;132;197;238	H4	900	IC	32.35	-	Positive	Unchecked	Unknown	-	32.35	0	-	-		FAM		0.08	0.93	None			173
255;103;103;103	H5	901	IC	32.11	-	Positive	Unchecked	Unknown	-	32.11	0	-	-		FAM		0.08	0.97	None			175
255;242;138;21	H6	902	IC	33.03	-	Positive	Unchecked	Unknown	-	33.03	0	-	-		FAM		0.06	0.75	None			177
255;250;215;15	H7	EC1	IC	34.79	-	Positive	Unchecked	Positive control	-	34.79	0	-	-		FAM		0.05	0.54	None			179
255;103;154;47	H8	EC2	IC	33.42	-	Positive	Unchecked	Positive control	-	33.42	0	-	-		FAM		0.07	0.8	None			181
255;34;176;146	H12	NC	IC	-	-	Negative	Unchecked	Negative control	-	-	-	-	-		FAM		0	0.02	None			183

## Sheet: analysis
Position	Sample Name	Gene name	Ct	Position	Sample Name	Gene name	Ct	Plate	RNA batch 1	RNA batch 2	Sample	Sample Name	Status
A1	861	SARS	-	E1	861	IC	33.49	VALID	VALID	VALID	VALID	861	-
A2	862	SARS	-	E2	862	IC	33.27				VALID	862	-
A3	863	SARS	-	E3	863	IC	32.92				VALID	863	-
A4	864	SARS	-	E4	864	IC	32.71				VALID	864	-
A5	865	SARS	-	E5	865	IC	34.02				VALID	865	-
A6	866	SARS	-	E6	866	IC	33.73				VALID	866	-
A7	867	SARS	-	E7	867	IC	33.6				VALID	867	-
A8	868	SARS	27.26	E8	868	IC	32.5				VALID	868	+
A9	869	SARS	-	E9	869	IC	34.16				VALID	869	-
A10	870	SARS	-	E10	870	IC	33.03				VALID	870	-
A11	871	SARS	-	E11	871	IC	34.17				VALID	871	-
A12	872	SARS	-	E12	872	IC	33.12				VALID	872	-
B1	873	SARS	-	F1	873	IC	32.93				VALID	873	-
B2	874	SARS	-	F2	874	IC	33.2				VALID	874	-
B3	875	SARS	-	F3	875	IC	33.29				VALID	875	-
B4	876	SARS	-	F4	876	IC	32.64				VALID	876	-
B5	877	SARS	-	F5	877	IC	32.7				VALID	877	-
B6	878	SARS	-	F6	878	IC	32.54				VALID	878	-
B7	879	SARS	-	F7	879	IC	33.61				VALID	879	-
B8	880	SARS	-	F8	880	IC	34.23				VALID	880	-
B9	881	SARS	-	F9	881	IC	33.04				VALID	881	-
B10	882	SARS	-	F10	882	IC	32.69				VALID	882	-
B11	883	SARS	-	F11	883	IC	32.97				VALID	883	-
B12	884	SARS	-	F12	884	IC	31.94				VALID	884	-
C1	885	SARS	22.83	G1	885	IC	32.27				VALID	885	+
C2	886	SARS	-	G2	886	IC	32.05				VALID	886	-
C3	887	SARS	38.39	G3	887	IC	33.56				VALID	887	+
C4	888	SARS	22.45	G4	888	IC	31.96				VALID	888	+
C5	889	SARS	-	G5	889	IC	32.48				VALID	889	-
C6	890	SARS	-	G6	890	IC	33.44				VALID	890	-
C7	891	SARS	-	G7	891	IC	33.28				VALID	891	-
C8	892	SARS	-	G8	892	IC	32.94				VALID	892	-
C9	893	SARS	-	G9	893	IC	32.4				VALID	893	-
C10	894	SARS	-	G10	894	IC	32.02				VALID	894	-
C11	895	SARS	-	G11	895	IC	32.2				VALID	895	-
C12	896	SARS	-	G12	896	IC	31.97				VALID	896	-
D1	897	SARS	-	H1	897	IC	31.54				VALID	897	-
D2	898	SARS	-	H2	898	IC	31.94				VALID	898	-
D3	899	SARS	-	H3	899	IC	31.88				VALID	899	-
D4	900	SARS	-	H4	900	IC	32.35				VALID	900	-
D5	901	SARS	-	H5	901	IC	32.11				VALID	901	-
D6	902	SARS	-	H6	902	IC	33.03				VALID	902	-
D7	EC1	SARS	-	H7	EC1	IC	34.79
D8	EC2	SARS	-	H8	EC2	IC	33.42
D10	PC1	SARS	26.94	H12	NC	IC	-
D11	PC2	SARS	31.6
D12	NC	SARS	-
